# Supplementary material
Source: Royal Society of Chemistry journal article supplement (doi:10.1039/d5em01010a)
Supplement: d5em01010a1.pdf [file d5em01010a1.pdf]

## Supplementary information

# Toxicity assessment of coal ash after 50 years of weathering: integration of multielement analysis and biological endpoints

Petrović, M.<sup>1</sup>, Vidaković-Cifrek, Ž.<sup>2</sup>, Medunić, G.<sup>2</sup>, Fiket, Ž.<sup>1\*</sup>

Ruder Bošković Institute, Bijenička cesta 54, 10000 Zagreb, Croatia

Faculty of Science, University of Zagreb, Horvatovac 102a, 10000 Zagreb, Croatia

\* Corresponding author:

E-mail address: [zeljka.fiket@irb.hr](mailto:zeljka.fiket@irb.hr)

Contents: 10 Tables, 1 Figure

**Table S1.** pH of eluates before and after pH adjustment.

| Landfill           | Sample | Type       | Initial pH | pH after correction |
|--------------------|--------|------------|------------|---------------------|
| Plaški (LP)        | LP3    | Bare       | 8.3        | 6.8                 |
|                    | LP10   | Bare       | 7.3        | 6.9                 |
|                    | LP1    | Veg.       | 6.5        | -                   |
|                    | LP5    | Veg.       | 6.5        | -                   |
|                    | LP8    | Soil       | 7.7        | 6.8                 |
|                    | LP9    | Soil       | 6.8        | -                   |
| Štrmac (LŠ)        | LŠ8    | Bare       | 13.5       | 6.8                 |
|                    | LŠ11   | Bare       | 13.2       | 6.7                 |
|                    | LŠ5    | Veg.       | 8.1        | 6.9                 |
|                    | LŠ4    | Veg.       | 7.4        | 6.7                 |
|                    | LŠ1    | Soil       | 8.1        | 6.9                 |
|                    | LŠ7    | Soil       | 6.7        | -                   |
| Unweathered<br>CCR | FA     | Fly ash    | 11.9       | 6.5                 |
|                    | BA     | Bottom ash | 13.1       | 6.9                 |

**Table S2.** Total concentration of major oxides measured in weathered coal ash and soil samples from the Štrmac locality (wt%).

|                               | Al <sub>2</sub> O <sub>3</sub> | CaO  | Fe <sub>2</sub> O <sub>3</sub> | K <sub>2</sub> O | MgO  | MnO  | Na <sub>2</sub> O | P <sub>2</sub> O <sub>5</sub> | SO <sub>3</sub> | TiO <sub>2</sub> |
|-------------------------------|--------------------------------|------|--------------------------------|------------------|------|------|-------------------|-------------------------------|-----------------|------------------|
| Soil samples                  |                                |      |                                |                  |      |      |                   |                               |                 |                  |
| LŠ1 <sub>1</sub>              | 9.68                           | 13.6 | 4.17                           | 1.40             | 1.41 | 0.17 | 0.50              | 0.14                          | 0.25            | 0.61             |
| LŠ1 <sub>2</sub>              | 8.35                           | 18.1 | 4.95                           | 1.31             | 1.23 | 0.16 | 0.45              | 0.11                          | 0.42            | 0.52             |
| LŠ1 <sub>3</sub>              | 8.82                           | 16.8 | 5.51                           | 1.15             | 1.08 | 0.15 | 0.39              | 0.11                          | 0.30            | 0.53             |
| LŠ2 <sub>1</sub>              | 8.07                           | 8.00 | 3.19                           | 0.84             | 0.70 | 0.13 | 0.27              | 0.13                          | 0.50            | 0.56             |
| LŠ2 <sub>2</sub>              | 8.60                           | 6.66 | 3.41                           | 0.77             | 0.68 | 0.13 | 0.25              | 0.12                          | 0.39            | 0.61             |
| LŠ7                           | 7.23                           | 19.6 | 10.8                           | 0.07             | 1.89 | 0.03 | 0.10              | 0.06                          | 32.2            | 0.35             |
| Bare weathered ash            |                                |      |                                |                  |      |      |                   |                               |                 |                  |
| LŠ8 <sub>1</sub>              | 3.86                           | 33.5 | 2.25                           | 0.06             | 2.55 | 0.01 | 0.07              | 0.03                          | 10.4            | 0.21             |
| LŠ8 <sub>2</sub>              | 3.17                           | 32.4 | 1.60                           | 0.07             | 2.01 | 0.01 | 0.06              | 0.02                          | 11.6            | 0.18             |
| LŠ8 <sub>3</sub>              | 3.01                           | 33.3 | 1.65                           | 0.07             | 1.96 | 0.01 | 0.06              | 0.02                          | 13.0            | 0.16             |
| LŠ9 <sub>1</sub>              | 3.01                           | 28.6 | 2.22                           | 0.06             | 1.79 | 0.01 | 0.06              | 0.02                          | 15.3            | 0.16             |
| LŠ9 <sub>2</sub>              | 2.84                           | 33.7 | 1.86                           | 0.05             | 1.75 | 0.01 | 0.04              | 0.02                          | 15.6            | 0.16             |
| LŠ9 <sub>3</sub>              | 2.80                           | 30.7 | 1.80                           | 0.04             | 2.07 | 0.01 | 0.03              | 0.02                          | 12.2            | 0.15             |
| LŠ10 <sub>1</sub>             | 3.24                           | 34.8 | 1.89                           | 0.05             | 2.06 | 0.01 | 0.05              | 0.02                          | 12.9            | 0.17             |
| LŠ10 <sub>2</sub>             | 3.27                           | 32.7 | 1.96                           | 0.06             | 2.03 | 0.01 | 0.07              | 0.02                          | 14.6            | 0.18             |
| LŠ10 <sub>3</sub>             | 3.63                           | 33.7 | 2.14                           | 0.06             | 2.04 | 0.01 | 0.07              | 0.02                          | 14.4            | 0.19             |
| LŠ11 <sub>1</sub>             | 4.61                           | 30.5 | 3.00                           | 0.06             | 5.31 | 0.01 | 0.09              | 0.03                          | 11.0            | 0.26             |
| LŠ11 <sub>2</sub>             | 3.30                           | 33.9 | 2.17                           | 0.05             | 2.84 | 0.01 | 0.07              | 0.03                          | 14.2            | 0.19             |
| LŠ11 <sub>3</sub>             | 3.37                           | 36.4 | 2.22                           | 0.07             | 2.56 | 0.01 | 0.08              | 0.03                          | 10.7            | 0.21             |
| Weathered ash with vegetation |                                |      |                                |                  |      |      |                   |                               |                 |                  |
| LŠ3 <sub>1</sub>              | 2.70                           | 43.4 | 1.36                           | 0.06             | 0.68 | 0.01 | 0.04              | 0.03                          | 2.74            | 0.15             |
| LŠ3 <sub>2</sub>              | 3.46                           | 43.5 | 1.75                           | 0.04             | 0.93 | 0.01 | 0.01              | 0.02                          | 1.60            | 0.21             |
| LŠ3 <sub>3</sub>              | 3.34                           | 44.4 | 1.72                           | 0.04             | 0.99 | 0.01 | 0.01              | 0.03                          | 1.38            | 0.21             |
| LŠ4 <sub>1</sub>              | 2.61                           | 40.7 | 1.70                           | 0.07             | 0.91 | 0.01 | 0.02              | 0.03                          | 4.03            | 0.15             |
| LŠ4 <sub>2</sub>              | 2.05                           | 45.9 | 1.40                           | 0.04             | 0.93 | 0.01 | 0.02              | 0.02                          | 1.87            | 0.12             |
| LŠ4 <sub>3</sub>              | 2.73                           | 44.8 | 1.67                           | 0.06             | 1.16 | 0.01 | 0.03              | 0.03                          | 1.36            | 0.15             |
| LŠ5 <sub>1</sub>              | 3.90                           | 30.7 | 2.29                           | 0.38             | 1.29 | 0.05 | 0.29              | 0.22                          | 2.86            | 0.20             |
| LŠ5 <sub>2</sub>              | 3.55                           | 33.6 | 2.14                           | 0.33             | 1.23 | 0.06 | 0.26              | 0.20                          | 2.40            | 0.20             |
| LŠ5 <sub>3</sub>              | 4.13                           | 31.2 | 4.00                           | 0.33             | 1.45 | 0.06 | 0.26              | 0.22                          | 2.91            | 0.22             |
| LŠ6 <sub>1</sub>              | 2.22                           | 42.3 | 1.70                           | 0.05             | 1.83 | 0.01 | 0.05              | 0.06                          | 3.54            | 0.12             |
| LŠ6 <sub>2</sub>              | 2.38                           | 39.1 | 1.76                           | 0.06             | 1.82 | 0.01 | 0.05              | 0.05                          | 3.93            | 0.13             |
| LŠ6 <sub>3</sub>              | 2.30                           | 40.7 | 1.64                           | 0.06             | 1.67 | 0.01 | 0.05              | 0.04                          | 3.48            | 0.12             |

**Table S3.** Total concentration of major oxides measured in weathered coal ash and soil samples from the Plaški locality (wt%).

|                                                                                              | Al <sub>2</sub> O <sub>3</sub> | CaO  | Fe <sub>2</sub> O <sub>3</sub> | K <sub>2</sub> O | MgO  | MnO  | Na <sub>2</sub> O | P <sub>2</sub> O <sub>5</sub> | SO <sub>3</sub> | TiO <sub>2</sub> |
|----------------------------------------------------------------------------------------------|--------------------------------|------|--------------------------------|------------------|------|------|-------------------|-------------------------------|-----------------|------------------|
| Soil samples                                                                                 |                                |      |                                |                  |      |      |                   |                               |                 |                  |
| LP8 <sub>1</sub>                                                                             | 13.1                           | 10.8 | 6.53                           | 0.87             | 1.71 | 0.04 | 0.18              | 0.09                          | 1.51            | 0.50             |
| LP8 <sub>2</sub>                                                                             | 12.6                           | 10.8 | 7.14                           | 0.87             | 1.31 | 0.12 | 0.24              | 0.10                          | 1.46            | 0.49             |
| LP8 <sub>3</sub>                                                                             | 14.0                           | 10.7 | 6.90                           | 1.01             | 1.64 | 0.06 | 0.25              | 0.12                          | 1.32            | 0.53             |
| LP9                                                                                          | 16.1                           | 8.76 | 7.50                           | 1.07             | 1.69 | 0.04 | 0.20              | 0.09                          | 1.57            | 0.58             |
| Bare weathered ash                                                                           |                                |      |                                |                  |      |      |                   |                               |                 |                  |
| LP10 <sub>1</sub>                                                                            | 9.99                           | 25.9 | 5.39                           | 0.45             | 1.72 | 0.03 | 0.26              | 0.16                          | 1.33            | 0.37             |
| LP11                                                                                         | 12.0                           | 20.1 | 5.34                           | 0.51             | 1.55 | 0.02 | 0.10              | 0.15                          | 1.63            | 0.45             |
| LP3 <sub>1</sub>                                                                             | 11.4                           | 18.7 | 8.29                           | 0.68             | 2.57 | 0.05 | 0.40              | 0.12                          | 3.83            | 0.43             |
| LP3 <sub>2</sub>                                                                             | 8.18                           | 18.0 | 5.90                           | 0.47             | 1.82 | 0.03 | 0.25              | 0.09                          | 4.24            | 0.33             |
| LP3 <sub>3</sub>                                                                             | 10.8                           | 17.5 | 7.39                           | 0.82             | 2.31 | 0.05 | 0.39              | 0.10                          | 3.74            | 0.42             |
| LP3 <sub>4</sub>                                                                             | 9.15                           | 25.4 | 6.32                           | 0.50             | 2.18 | 0.04 | 0.41              | 0.11                          | 3.70            | 0.39             |
| LP7 <sub>1</sub>                                                                             | 8.36                           | 23.4 | 5.06                           | 0.48             | 1.51 | 0.03 | 0.23              | 0.10                          | 1.56            | 0.34             |
| LP7 <sub>1</sub>                                                                             | 9.87                           | 21.4 | 4.86                           | 0.53             | 1.76 | 0.03 | 0.23              | 0.08                          | 1.35            | 0.36             |
| LP7 <sub>2</sub>                                                                             | 9.14                           | 24.9 | 4.81                           | 0.42             | 1.58 | 0.02 | 0.17              | 0.08                          | 1.21            | 0.34             |
| LP7 <sub>3</sub>                                                                             | 9.58                           | 28.7 | 5.28                           | 0.47             | 1.79 | 0.03 | 0.23              | 0.10                          | 1.27            | 0.37             |
| Weathered ash with vegetation ( <i>*in between – a bare sample with few pioneer plants</i> ) |                                |      |                                |                  |      |      |                   |                               |                 |                  |
| LP1 <sub>2</sub> *                                                                           | 11.7                           | 22.5 | 7.50                           | 0.66             | 2.39 | 0.04 | 0.25              | 0.13                          | 1.29            | 0.47             |
| LP1 <sub>5</sub> *                                                                           | 11.3                           | 21.6 | 7.37                           | 0.63             | 2.25 | 0.04 | 0.25              | 0.12                          | 1.13            | 0.45             |
| LP1 <sub>6</sub> *                                                                           | 12.6                           | 21.1 | 7.18                           | 0.72             | 2.32 | 0.04 | 0.27              | 0.13                          | 1.14            | 0.48             |
| LP4 <sub>1</sub>                                                                             | 12.3                           | 17.8 | 7.14                           | 0.71             | 1.86 | 0.03 | 0.17              | 0.13                          | 1.01            | 0.46             |
| LP4 <sub>2</sub>                                                                             | 10.8                           | 23.5 | 5.20                           | 0.48             | 1.52 | 0.03 | 0.13              | 0.09                          | 1.24            | 0.38             |
| LP4 <sub>3</sub>                                                                             | 11.0                           | 20.5 | 5.86                           | 0.52             | 1.64 | 0.02 | 0.19              | 0.09                          | 1.15            | 0.42             |
| LP4 <sub>4</sub>                                                                             | 10.9                           | 19.6 | 6.04                           | 0.51             | 1.72 | 0.03 | 0.17              | 0.11                          | 1.15            | 0.43             |
| LP5 <sub>2</sub>                                                                             | 14.1                           | 18.1 | 6.47                           | 0.65             | 1.62 | 0.03 | 0.13              | 0.10                          | 1.00            | 0.50             |
| LP5 <sub>3</sub>                                                                             | 14.2                           | 18.9 | 7.12                           | 0.64             | 1.77 | 0.03 | 0.13              | 0.13                          | 1.13            | 0.50             |
| LP5 <sub>4</sub>                                                                             | 13.2                           | 18.3 | 6.83                           | 0.66             | 1.72 | 0.03 | 0.12              | 0.10                          | 1.03            | 0.49             |
| LP5 <sub>5</sub>                                                                             | 13.6                           | 19.3 | 6.73                           | 0.62             | 1.65 | 0.04 | 0.11              | 0.10                          | 1.09            | 0.49             |
| LP6 <sub>1</sub>                                                                             | 14.1                           | 13.3 | 6.75                           | 0.85             | 1.57 | 0.03 | 0.15              | 0.14                          | 0.97            | 0.52             |
| LP6 <sub>2</sub>                                                                             | 14.1                           | 17.0 | 6.95                           | 0.75             | 1.72 | 0.03 | 0.14              | 0.12                          | 0.98            | 0.51             |
| LP6 <sub>3</sub>                                                                             | 11.3                           | 20.6 | 6.35                           | 0.51             | 1.61 | 0.03 | 0.12              | 0.10                          | 1.32            | 0.45             |
| LP6 <sub>4</sub>                                                                             | 13.5                           | 21.0 | 6.76                           | 0.59             | 1.75 | 0.03 | 0.14              | 0.11                          | 1.10            | 0.51             |

**Table S4.** Total concentration of trace elements measured in weathered coal ash and soil samples from the Štrmac locality (mg kg<sup>-1</sup>).

|                               | Essential micronutrients |       |      |      | Non-essential and beneficial |       |      |       |      |      |      |      |      |      | Non-essential and toxic |      |       |      |      |      |      |      |      |      |
|-------------------------------|--------------------------|-------|------|------|------------------------------|-------|------|-------|------|------|------|------|------|------|-------------------------|------|-------|------|------|------|------|------|------|------|
|                               | Cu                       | Mo    | Ni   | Zn   | Ba                           | Ce    | Co   | Cs    | Li   | Rb   | Sc   | Se   | Sr   | V    | As                      | Be   | Bi    | Cd   | Cr   | Pb   | Sb   | Sn   | Tl   | U    |
| Limit of detection (LOD)      |                          |       |      |      |                              |       |      |       |      |      |      |      |      |      |                         |      |       |      |      |      |      |      |      |      |
|                               | 0.5                      | 0.15  | 0.6  | 2    | 0.5                          | 0.002 | 0.05 | 0.002 | 0.15 | 0.05 | 0.6  | 0.05 | 0.6  | 0.05 | 0.5                     | 0.01 | 0.002 | 0.05 | 0.5  | 0.5  | 0.15 | 0.01 | 0.05 | 0.05 |
| Soil samples                  |                          |       |      |      |                              |       |      |       |      |      |      |      |      |      |                         |      |       |      |      |      |      |      |      |      |
| LŠ1 <sub>1</sub>              | 74.8                     | 1.52  | 101  | 108  | 334                          | 56.4  | 19.8 | 6.34  | 46.4 | 103  | 11.2 | 10.3 | 251  | 131  | 7.38                    | 1.68 | 1.88  | 0.22 | 142  | 29.1 | 0.93 | 3.88 | 0.61 | 3.89 |
| LŠ1 <sub>2</sub>              | 45.4                     | 2.39  | 94.9 | 165  | 320                          | 50.6  | 18.6 | 5.39  | 40.7 | 87.1 | 9.48 | 49.8 | 260  | 122  | 8.50                    | 1.44 | 0.40  | 0.30 | 128  | 38.3 | 1.52 | 3.61 | 0.55 | 3.81 |
| LŠ1 <sub>3</sub>              | 48.8                     | 2.59  | 92.4 | 141  | 303                          | 55.1  | 18.5 | 5.98  | 43.7 | 89.3 | 9.60 | 23.3 | 282  | 135  | 14.6                    | 1.73 | 0.43  | 0.51 | 137  | 63.0 | 1.47 | 3.75 | 0.71 | 3.41 |
| LŠ2 <sub>1</sub>              | 308                      | 3.66  | 60.4 | 540  | 234                          | 67.8  | 15.1 | 5.15  | 37.3 | 70.6 | 8.56 | 64.1 | 133  | 147  | 11.6                    | 1.81 | 0.49  | 1.31 | 110  | 66.5 | 1.50 | 7.38 | 0.98 | 4.17 |
| LŠ2 <sub>2</sub>              | 360                      | 3.53  | 67.6 | 510  | 240                          | 69.7  | 15.5 | 5.48  | 38.9 | 73.6 | 8.97 | 5.44 | 119  | 153  | 12.6                    | 1.95 | 0.53  | 1.16 | 117  | 70.2 | 1.78 | 7.13 | 1.02 | 3.67 |
| LŠ7                           | 130                      | 88.7  | 302  | 369  | 158                          | 69.7  | 40.9 | 0.43  | 43.7 | 7.99 | 12.5 | 8.23 | 850  | 602  | 115                     | 4.45 | 0.18  | 8.20 | 156  | 38.9 | 17.8 | 8.26 | 0.83 | 107  |
| Bare weathered ash            |                          |       |      |      |                              |       |      |       |      |      |      |      |      |      |                         |      |       |      |      |      |      |      |      |      |
| LŠ8 <sub>1</sub>              | 163                      | 41.8  | 59.0 | 15.8 | 172                          | 25.2  | 5.95 | 0.62  | 21.7 | 3.54 | 5.96 | 10.6 | 580  | 216  | 6.82                    | 1.48 | 0.05  | bdl  | 121  | 5.14 | 0.43 | 1.59 | 0.11 | 36.7 |
| LŠ8 <sub>2</sub>              | 67.0                     | 30.7  | 44.8 | 24.3 | 97.3                         | 20.4  | 4.78 | 0.77  | 25.  | 4.00 | 4.87 | 10.2 | 604  | 154  | 5.02                    | 1.24 | 0.03  | bdl  | 98.3 | 3.52 | 0.45 | 1.33 | 0.11 | 23.9 |
| LŠ8 <sub>3</sub>              | 188                      | 33.6  | 45.8 | 11.1 | 105                          | 21.4  | 4.74 | 0.74  | 20.6 | 3.93 | 4.86 | 10.0 | 558  | 154  | 6.21                    | 1.28 | 0.03  | bdl  | 88.1 | 3.62 | 0.42 | 1.16 | 0.11 | 25.9 |
| LŠ9 <sub>1</sub>              | 47.7                     | 36.3  | 55.6 | 21.1 | 100                          | 20.2  | 5.54 | 0.62  | 20.6 | 3.53 | 4.76 | 16.6 | 650  | 231  | 14.6                    | 1.15 | 0.10  | 0.53 | 91.4 | 6.61 | 0.78 | 1.64 | 0.75 | 44.4 |
| LŠ9 <sub>2</sub>              | 74.9                     | 40.5  | 50.5 | 19.7 | 93.9                         | 20.1  | 4.87 | 0.55  | 16.6 | 3.34 | 4.71 | 14.4 | 697  | 223  | 7.90                    | 1.16 | 0.03  | bdl  | 88.8 | 2.95 | 0.39 | 1.00 | 0.14 | 44.2 |
| LŠ9 <sub>3</sub>              | 45.3                     | 37.5  | 50.7 | 11.0 | 90.1                         | 17.8  | 5.02 | 0.42  | 13.2 | 2.58 | 4.21 | 9.49 | 543  | 190  | 6.12                    | 1.00 | 0.02  | bdl  | 76.0 | 3.72 | 0.35 | 0.92 | 0.11 | 40.7 |
| LŠ10 <sub>1</sub>             | 57.0                     | 35.6  | 45.3 | 8.92 | 101                          | 22.2  | 5.09 | 0.54  | 21.0 | 3.12 | 5.13 | 12.0 | 689  | 193  | 7.07                    | 1.08 | 0.03  | bdl  | 96.5 | 2.43 | 0.43 | 1.02 | 0.15 | 30.9 |
| LŠ10 <sub>2</sub>             | 65.0                     | 32.7  | 47.8 | 15.0 | 129                          | 23.0  | 5.33 | 0.59  | 23.9 | 3.42 | 5.14 | 33.2 | 778  | 183  | 6.60                    | 1.12 | 0.03  | bdl  | 97.6 | 4.75 | 0.51 | 1.25 | 0.13 | 30.7 |
| LŠ10 <sub>3</sub>             | 44.3                     | 36.9  | 54.8 | 16.4 | 132                          | 25.2  | 5.85 | 0.61  | 25.0 | 3.55 | 5.85 | 13.1 | 869  | 217  | 7.32                    | 1.23 | 0.04  | bdl  | 101  | 4.16 | 0.57 | 1.24 | 0.13 | 34.1 |
| LŠ11 <sub>1</sub>             | 67.8                     | 56.0  | 84.3 | 15.3 | 105                          | 36.7  | 7.38 | 0.58  | 29.8 | 3.63 | 7.99 | 10.2 | 964  | 282  | 11.0                    | 1.70 | 0.04  | 0.30 | 127  | 6.40 | 0.55 | 1.47 | 0.19 | 71.6 |
| LŠ11 <sub>2</sub>             | 70.2                     | 38.8  | 65.8 | 23.9 | 115                          | 26.9  | 5.49 | 0.52  | 20.5 | 3.01 | 6.17 | 6.09 | 997  | 227  | 7.79                    | 1.31 | 0.03  | 0.08 | 100  | 6.56 | 0.40 | 1.23 | 0.13 | 56.4 |
| LŠ11 <sub>3</sub>             | 69.4                     | 33.0  | 64.3 | 16.7 | 90.3                         | 28.2  | 5.36 | 0.54  | 22.7 | 3.50 | 6.38 | 63.5 | 1115 | 220  | 7.45                    | 1.30 | 0.03  | 0.05 | 98.8 | 6.48 | 0.40 | 1.23 | 0.12 | 55.2 |
| Weathered ash with vegetation |                          |       |      |      |                              |       |      |       |      |      |      |      |      |      |                         |      |       |      |      |      |      |      |      |      |
| LŠ3 <sub>1</sub>              | 63.7                     | 3.25  | 42.2 | 49.3 | 43.8                         | 12.1  | 4.17 | 0.45  | 8.91 | 2.83 | 2.87 | 5.91 | 732  | 205  | 5.22                    | 0.73 | 0.04  | 0.45 | 72.6 | 12.3 | 0.53 | 2.35 | 0.12 | 14.8 |
| LŠ3 <sub>2</sub>              | 67.6                     | 3.10  | 42.9 | 41.7 | 41.4                         | 13.4  | 4.34 | 0.51  | 9.54 | 3.12 | 3.02 | 7.14 | 710  | 209  | 4.87                    | 0.77 | 0.04  | 0.42 | 79.2 | 10.9 | 0.55 | 2.06 | 0.13 | 16.6 |
| LŠ3 <sub>3</sub>              | 63.8                     | 2.88  | 40.9 | 37.1 | 42.6                         | 14.1  | 4.18 | 0.51  | 9.35 | 3.18 | 3.06 | 7.85 | 725  | 205  | 4.97                    | 0.75 | 0.04  | 0.37 | 80.1 | 10.8 | 0.50 | 2.45 | 0.15 | 20.0 |
| LŠ4 <sub>1</sub>              | 511                      | 5.80  | 48.2 | 1860 | 228                          | 24.1  | 6.80 | 1.76  | 17.9 | 24.5 | 4.70 | 5.61 | 434  | 105  | 8.82                    | 0.96 | 0.35  | 1.15 | 76.1 | 140  | 2.22 | 14.9 | 0.38 | 9.56 |
| LŠ4 <sub>2</sub>              | 734                      | 6.14  | 46.9 | 1691 | 215                          | 22.5  | 6.88 | 1.55  | 18.1 | 22.1 | 4.33 | 3.67 | 426  | 103  | 8.30                    | 0.95 | 0.34  | 1.25 | 83.2 | 98.0 | 2.35 | 32.3 | 0.34 | 10.4 |
| LŠ4 <sub>3</sub>              | 1822                     | 8.90  | 60.8 | 2012 | 289                          | 25.6  | 8.61 | 1.68  | 20.8 | 23.3 | 5.05 | 5.38 | 510  | 136  | 15.2                    | 1.17 | 0.34  | 1.22 | 82.7 | 142  | 7.11 | 38.4 | 0.36 | 13.1 |
| LŠ5 <sub>1</sub>              | 25.4                     | 24.1  | 52.2 | 48.8 | 42.3                         | 16.3  | 5.59 | 0.45  | 13.7 | 4.17 | 3.33 | 48.8 | 363  | 86.4 | 18.3                    | 0.80 | 0.20  | 1.00 | 48.0 | 14.4 | 1.37 | 2.08 | 0.53 | 14.4 |
| LŠ5 <sub>2</sub>              | 17.63                    | 19.23 | 44.4 | 29.3 | 38.4                         | 13.7  | 4.41 | 0.35  | 10.6 | 3.06 | 2.86 | 8.04 | 382  | 81.9 | 17.7                    | 0.63 | 0.14  | 1.05 | 35.7 | 9.65 | 1.19 | 1.96 | 0.58 | 14.7 |
| LŠ5 <sub>3</sub>              | 21.19                    | 22.48 | 53.4 | 143  | 46.4                         | 17.0  | 5.29 | 0.61  | 14.2 | 3.60 | 3.46 | 8.33 | 413  | 101  | 21.7                    | 0.72 | 0.17  | 2.26 | 43.0 | 14.6 | 1.53 | 1.67 | 1.55 | 18.1 |
| LŠ6 <sub>1</sub>              | 18.98                    | 29.66 | 41.8 | 28.7 | 29.4                         | 13.8  | 4.61 | 0.37  | 14.5 | 3.54 | 2.71 | 8.64 | 373  | 57.3 | 17.6                    | 0.62 | 0.19  | 0.67 | 44.2 | 12.8 | 1.14 | 1.67 | 0.37 | 9.41 |
| LŠ6 <sub>2</sub>              | 47.53                    | 32.90 | 50.1 | 29.0 | 27.9                         | 17.0  | 5.92 | 0.31  | 17.4 | 2.29 | 3.26 | 8.17 | 352  | 62.0 | 21.6                    | 0.71 | 0.26  | 0.68 | 54.7 | 14.2 | 1.45 | 1.80 | 0.39 | 11.7 |
| LŠ6 <sub>3</sub>              | 27.82                    | 32.98 | 49.1 | 29.5 | 43.8                         | 17.0  | 5.56 | 0.31  | 18.1 | 2.27 | 3.21 | 9.16 | 349  | 64.7 | 20.9                    | 0.68 | 0.29  | 0.70 | 53.9 | 12.2 | 1.43 | 1.96 | 0.38 | 12.2 |

**Table S5.** Total concentration of trace elements measured in weathered coal ash and soil samples from the Plaški locality (mg kg<sup>-1</sup>).

|                                                                                     | Essential micronutrients |      |      |       | Non-essential and beneficial |      |      |      |      |      |      |       |      |     | Non-essential and toxic |      |      |      |     |      |      |      |      |      |
|-------------------------------------------------------------------------------------|--------------------------|------|------|-------|------------------------------|------|------|------|------|------|------|-------|------|-----|-------------------------|------|------|------|-----|------|------|------|------|------|
|                                                                                     | Cu                       | Mo   | Ni   | Zn    | Ba                           | Ce   | Co   | Cs   | Li   | Rb   | Sc   | Se    | Sr   | V   | As                      | Be   | Bi   | Cd   | Cr  | Pb   | Sb   | Sn   | Tl   | U    |
| Soil samples                                                                        |                          |      |      |       |                              |      |      |      |      |      |      |       |      |     |                         |      |      |      |     |      |      |      |      |      |
| LP8 <sub>1</sub>                                                                    | 117                      | 17.2 | 552  | 96.1  | 306                          | 41.8 | 26.4 | 13.0 | 61.3 | 65.8 | 17.7 | 15.58 | 270  | 253 | 89.2                    | 2.02 | 0.23 | 0.57 | 375 | 17.4 | 2.48 | 3.05 | 0.66 | 30.1 |
| LP8 <sub>2</sub>                                                                    | 91.5                     | 14.2 | 410  | 61.9  | 322                          | 39.5 | 23.8 | 11.1 | 53.3 | 61.3 | 14.8 | 7.91  | 253  | 201 | 21.1                    | 2.00 | 0.10 | 0.28 | 273 | 9.29 | 1.87 | 1.58 | 0.33 | 23.6 |
| LP8 <sub>3</sub>                                                                    | 92.9                     | 12.8 | 325  | 60.3  | 415                          | 41.8 | 22.7 | 13.2 | 58.7 | 70.1 | 17.5 | 2.87  | 261  | 218 | 21.1                    | 2.04 | 0.09 | 0.26 | 296 | 8.33 | 2.10 | 1.66 | 0.31 | 20.2 |
| LP9                                                                                 | 128                      | 12.4 | 806  | 75.1  | 273                          | 46.9 | 47.0 | 19.1 | 58.3 | 74.3 | 19.5 | 2.22  | 240  | 223 | 37.0                    | 2.38 | 0.14 | 0.35 | 488 | 13.8 | 2.10 | 2.91 | 0.47 | 17.3 |
| Bare weathered ash                                                                  |                          |      |      |       |                              |      |      |      |      |      |      |       |      |     |                         |      |      |      |     |      |      |      |      |      |
| LP10 <sub>1</sub>                                                                   | 84.4                     | 27.2 | 640  | 41.4  | 302                          | 29.5 | 34.2 | 10.9 | 36.9 | 45.6 | 15.1 | 17.05 | 546  | 218 | 22.4                    | 1.65 | 0.07 | 0.20 | 433 | 4.98 | 1.17 | 2.32 | 0.14 | 30.5 |
| LP11                                                                                | 120                      | 38.8 | 334  | 60.1  | 223                          | 38.7 | 20.0 | 9.74 | 50.9 | 49.7 | 14.2 | 6.18  | 446  | 287 | 26.8                    | 1.61 | 0.12 | 0.39 | 275 | 10.7 | 1.60 | 1.96 | 0.42 | 64.0 |
| LP3 <sub>1</sub>                                                                    | 116                      | 54.8 | 1074 | 70.8  | 450                          | 36.9 | 40.0 | 15.6 | 56.1 | 48.0 | 17.6 | 4.36  | 573  | 261 | 107                     | 1.75 | 3.19 | 0.46 | 633 | 14.5 | 2.07 | 3.15 | 0.46 | 64.4 |
| LP3 <sub>2</sub>                                                                    | 77.9                     | 40.4 | 797  | 66.0  | 376                          | 25.2 | 30.0 | 6.03 | 33.7 | 23.8 | 13.1 | 1.73  | 376  | 228 | 64.8                    | 1.15 | 0.14 | 0.37 | 464 | 10.0 | 2.01 | 2.09 | 0.32 | 43.2 |
| LP3 <sub>3</sub>                                                                    | 107                      | 30.9 | 1133 | 75.3  | 261                          | 30.0 | 40.5 | 9.66 | 51.5 | 56.0 | 17.4 | 2.47  | 383  | 224 | 81.0                    | 1.37 | 0.30 | 0.38 | 689 | 14.7 | 1.97 | 2.30 | 0.38 | 34.0 |
| LP3 <sub>4</sub>                                                                    | 101                      | 51.4 | 607  | 53.3  | 284                          | 26.0 | 28.7 | 5.67 | 39.5 | 31.1 | 13.8 | 1.92  | 648  | 254 | 56.0                    | 1.36 | 0.11 | 0.35 | 434 | 9.70 | 1.47 | 2.24 | 0.20 | 41.8 |
| LP7 <sub>1</sub>                                                                    | 79.1                     | 25.1 | 422  | 42.9  | 219                          | 28.5 | 22.1 | 7.44 | 37.3 | 41.5 | 10.8 | 2.84  | 469  | 238 | 23.0                    | 1.19 | 0.07 | 0.22 | 272 | 8.19 | 1.53 | 1.25 | 0.21 | 45.1 |
| LP7 <sub>1</sub>                                                                    | 74.3                     | 29.1 | 407  | 52.2  | 228                          | 30.6 | 22.7 | 9.33 | 37.9 | 46.4 | 12.7 | 6.70  | 439  | 249 | 21.0                    | 1.30 | 0.09 | 0.26 | 293 | 11.0 | 1.12 | 1.31 | 0.21 | 47.5 |
| LP7 <sub>2</sub>                                                                    | 75.9                     | 30.8 | 390  | 49.3  | 213                          | 28.9 | 22.5 | 6.74 | 31.6 | 38.1 | 11.9 | 2.38  | 399  | 247 | 20.1                    | 1.32 | 0.17 | 0.19 | 285 | 6.49 | 1.19 | 2.55 | 0.19 | 49.1 |
| LP7 <sub>3</sub>                                                                    | 79.2                     | 35.2 | 442  | 41.3  | 239                          | 30.9 | 24.7 | 7.85 | 34.4 | 42.0 | 13.0 | 2.17  | 492  | 245 | 20.1                    | 1.33 | 0.12 | 0.19 | 300 | 15.3 | 1.31 | 2.38 | 0.17 | 50.8 |
| Weathered ash with vegetation (*in between – a bare sample with few pioneer plants) |                          |      |      |       |                              |      |      |      |      |      |      |       |      |     |                         |      |      |      |     |      |      |      |      |      |
| LP1 <sub>2</sub> *                                                                  | 112                      | 36.1 | 786  | 73.1  | 332                          | 38.2 | 34.2 | 10.2 | 49.6 | 48.9 | 15.8 | 3.29  | 506  | 306 | 66.5                    | 1.70 | 0.14 | 0.43 | 529 | 12.9 | 1.89 | 1.71 | 0.38 | 52.9 |
| LP1 <sub>5</sub> *                                                                  | 103                      | 37.8 | 825  | 59.2  | 347                          | 36.1 | 35.3 | 10.6 | 47.3 | 49.4 | 15.8 | 3.28  | 489  | 288 | 66.0                    | 1.71 | 0.26 | 0.38 | 551 | 13.9 | 1.81 | 1.71 | 0.38 | 51.8 |
| LP1 <sub>6</sub> *                                                                  | 108                      | 35.4 | 818  | 127.8 | 348                          | 39.9 | 35.0 | 11.8 | 52.6 | 55.4 | 16.0 | 2.39  | 496  | 300 | 64.4                    | 1.75 | 0.16 | 0.47 | 558 | 15.7 | 1.98 | 2.09 | 0.42 | 55.4 |
| LP4 <sub>1</sub>                                                                    | 111                      | 31.3 | 563  | 69.9  | 254                          | 38.3 | 30.1 | 12.2 | 45.0 | 58.3 | 16.1 | 3.92  | 356  | 275 | 34.8                    | 1.71 | 0.13 | 0.36 | 393 | 15.1 | 1.65 | 2.86 | 0.45 | 56.5 |
| LP4 <sub>2</sub>                                                                    | 92.9                     | 26.0 | 435  | 60.1  | 225                          | 31.7 | 22.3 | 9.66 | 38.4 | 41.0 | 13.7 | 3.39  | 404  | 290 | 31.7                    | 1.35 | 0.10 | 0.34 | 346 | 15.7 | 1.54 | 2.81 | 0.47 | 44.8 |
| LP4 <sub>3</sub>                                                                    | 100                      | 29.9 | 441  | 97.2  | 222                          | 33.2 | 24.2 | 8.98 | 38.7 | 41.9 | 12.6 | 3.17  | 378  | 313 | 23.7                    | 1.44 | 0.10 | 0.26 | 330 | 9.08 | 1.35 | 1.51 | 0.34 | 48.7 |
| LP4 <sub>4</sub>                                                                    | 91.2                     | 30.1 | 458  | 41.8  | 234                          | 34.2 | 25.0 | 10.0 | 39.7 | 44.7 | 12.8 | 3.55  | 380  | 294 | 26.0                    | 1.58 | 0.07 | 0.30 | 341 | 9.62 | 1.52 | 1.39 | 0.40 | 50.8 |
| LP5 <sub>2</sub>                                                                    | 156                      | 24.3 | 602  | 60.2  | 236                          | 43.5 | 26.5 | 14.1 | 52.7 | 55.9 | 17.0 | 1.61  | 356  | 284 | 41.2                    | 2.03 | 0.11 | 0.41 | 384 | 15.0 | 1.98 | 1.92 | 0.43 | 37.7 |
| LP5 <sub>3</sub>                                                                    | 115                      | 28.6 | 579  | 70.5  | 317                          | 42.0 | 31.1 | 13.0 | 54.2 | 53.9 | 17.9 | 2.67  | 373  | 279 | 33.4                    | 1.97 | 0.10 | 0.33 | 392 | 10.8 | 1.97 | 2.80 | 0.35 | 46.3 |
| LP5 <sub>4</sub>                                                                    | 112                      | 29.0 | 535  | 51.6  | 232                          | 40.4 | 27.4 | 13.1 | 52.3 | 54.4 | 15.0 | 3.16  | 368  | 273 | 36.5                    | 1.93 | 2.63 | 0.38 | 392 | 10.5 | 2.03 | 1.66 | 0.35 | 45.3 |
| LP5 <sub>5</sub>                                                                    | 119                      | 24.3 | 531  | 62.1  | 234                          | 40.6 | 27.7 | 13.3 | 51.9 | 54.3 | 17.9 | 2.24  | 354  | 279 | 41.5                    | 1.90 | 0.14 | 0.32 | 392 | 11.6 | 2.16 | 2.22 | 0.38 | 41.9 |
| LP6 <sub>1</sub>                                                                    | 125                      | 24.0 | 535  | 77.2  | 261                          | 41.8 | 28.5 | 15.5 | 55.3 | 69.4 | 17.0 | 2.42  | 300  | 252 | 41.0                    | 1.91 | 0.19 | 0.55 | 408 | 20.7 | 1.93 | 2.02 | 0.57 | 37.2 |
| LP6 <sub>2</sub>                                                                    | 132                      | 31.3 | 510  | 54.0  | 229                          | 40.9 | 27.3 | 14.1 | 55.4 | 61.2 | 16.3 | 3.77  | 339  | 272 | 37.7                    | 1.92 | 0.10 | 0.39 | 379 | 13.8 | 1.83 | 1.82 | 0.39 | 43.4 |
| LP6 <sub>3</sub>                                                                    | 108                      | 31.2 | 511  | 46.5  | 211                          | 36.2 | 26.4 | 9.55 | 42.6 | 40.9 | 13.7 | 4.24  | 359  | 274 | 32.3                    | 1.61 | 0.10 | 0.36 | 362 | 9.35 | 1.28 | 1.45 | 0.32 | 49.8 |
| LP6 <sub>4</sub>                                                                    | 137                      | 33.6 | 500  | 56.1  | 239                          | 40.6 | 26.7 | 10.8 | 50.8 | 49.4 | 16.9 | 2.34  | 378  | 306 | 31.5                    | 1.84 | 0.11 | 0.35 | 382 | 10.2 | 1.64 | 2.24 | 0.33 | 52.7 |
| Unweathered bottom and fly ash (n.m. = not measured)                                |                          |      |      |       |                              |      |      |      |      |      |      |       |      |     |                         |      |      |      |     |      |      |      |      |      |
| BA                                                                                  | 56.5                     | 29.9 | 75.9 | 31.7  | 47.5                         | n.m. | 4.53 | 4.53 | 10.6 | 151  | n.m. | 2.73  | 946  | 523 | 7.68                    | 0.52 | 0.06 | 0.17 | 129 | 2.07 | 1.48 | 1.07 | 0.13 | 106  |
| FA                                                                                  | 48.1                     | 56.7 | 89.6 | 51.0  | 27.4                         | n.m. | 5.20 | 5.20 | 18.5 | 860  | n.m. | 43.1  | 1353 | 727 | 24.2                    | 0.99 | 0.24 | 1.12 | 162 | 17.2 | 2.38 | 1.99 | 1.75 | 137  |

|                              | LOD   | Negative control |       | Štrmac samples |      |       |      |      |      | Plaški samples |      |      |      |       |      | Unweathered |      |
|------------------------------|-------|------------------|-------|----------------|------|-------|------|------|------|----------------|------|------|------|-------|------|-------------|------|
|                              |       | 1                | 2     | LŠ1            | LŠ7  | LŠ8   | LŠ11 | LŠ5  | LŠ4  | LP8            | LP9  | LP3  | LP10 | LP1   | LP5  | FA          | BA   |
| Essential nutrients          |       |                  |       |                |      |       |      |      |      |                |      |      |      |       |      |             |      |
| Ca*                          | 0.002 | 96.6             | 100   | 40.0           | 617  | 443   | 992  | 29.8 | 43.6 | 30.8           | 28.9 | 407  | 58.2 | 42.2  | 27.9 | 639         | 1105 |
| Cu                           | 0.02  | 11.0             | 3.75  | 10.3           | bdl  | 11.4  | 22.1 | 3.46 | 54.9 | 1.39           | 0.25 | 2.53 | 7.40 | 4.59  | 5.11 | 0.93        | 7.49 |
| Fe                           | 0.02  | 78.3             | 0.43  | 132            | 65.9 | 266   | 27.7 | 191  | 119  | 38.4           | 17.0 | 21.2 | 33.8 | 35.9  | 34.4 | 18.9        | 25.5 |
| K*                           | 0.002 | 2.95             | 3.00  | 3.82           | 0.87 | 7.30  | 2.17 | 0.55 | 86.1 | 1.43           | 1.01 | 14.2 | 6.30 | 3.23  | 4.45 | 118         | 13.9 |
| Mg*                          | 0.002 | 23.4             | 22.3  | 2.79           | 4.55 | 0.08  | 0.07 | 1.37 | 2.02 | 0.95           | 1.44 | 86.4 | 5.86 | 2.41  | 0.73 | 0.24        | 0.18 |
| Mn                           | 0.008 | 3.27             | 0.88  | 6.95           | 13.1 | 2.94  | 2.56 | 8.48 | 5.25 | 0.30           | 0.10 | 7.65 | 0.52 | 1.61  | bdl  | bdl         | 1.29 |
| Mo                           | 0.002 | 0.27             | 0.24  | 8.37           | 177  | 58.5  | 356  | 6.79 | 3.45 | 4.70           | 3.28 | 1235 | 68.5 | 24.90 | 6.75 | 447         | 481  |
| Ni                           | 0.02  | 15.2             | 0.58  | 42.4           | 42.2 | 27.9  | 32.9 | 35.8 | 132  | 13.7           | 11.4 | 36.4 | 22.3 | 33.9  | 15.0 | 17.1        | 29.1 |
| Zn                           | 0.03  | 334              | 253   | 40.1           | 10.9 | 5.37  | 176  | 8.25 | 97.4 | 42.8           | 0.69 | 11.3 | 11.3 | 22.6  | 10.2 | 8.70        | 281  |
| Non-essential and beneficial |       |                  |       |                |      |       |      |      |      |                |      |      |      |       |      |             |      |
| Ba                           | 0.002 | 70.2             | 59.1  | 23.8           | 27.5 | 93.6  | 150  | 9.60 | 40.2 | 3.32           | 2.01 | 20.9 | 9.72 | 5.84  | 1.74 | 46.8        | 167  |
| Co                           | 0.002 | 0.02             | 0.05  | 0.18           | 0.15 | 0.09  | 0.11 | 0.12 | 0.08 | 0.07           | 0.04 | 0.19 | 0.05 | 0.02  | 0.10 | bdl         | 0.03 |
| Cs                           | 0.002 | bdl              | bdl   | 0.01           | bdl  | 0.31  | 1.21 | bdl  | 1.04 | 0.46           | 0.08 | 3.17 | 1.58 | 0.50  | 0.63 | 39.2        | 2.25 |
| Li                           | 0.003 | 1.39             | 1.12  | bdl            | 14.6 | 3.35  | 24.0 | bdl  | bdl  | 4.44           | 5.76 | 126  | 42.7 | 13.3  | 4.76 | 129         | 76.4 |
| Na*                          | 0.002 | 24.9             | 26.1  | 1.98           | 1.78 | 0.265 | 2.79 | 0.69 | 1.54 | 0.82           |      | 61.6 | 1.18 | 2.53  | 0.12 | 580         | 93.4 |
| Rb                           | 0.002 | 0.58             | 0.54  | 1.42           | 2.22 | 1.51  | 13.6 | 0.74 | 10.9 | 7.51           | 3.07 | 39.7 | 27.7 | 10.4  | 8.20 | 360         | 23.6 |
| Se                           | 0.002 | 0.12             | 0.52  | 5.65           | 5.36 | 0.09  | 5.49 | 4.18 | 5.18 | 5.29           | bdl  | 23.4 | 3.92 | 2.32  | 6.28 | 276         | 41.5 |
| Sr                           | 0.005 | 238              | 229   | 148            | 3865 | 1059  | 8261 | 57.5 | 158  | 73.8           | 51.2 | 1158 | 252  | 101   | 51.3 | 12780       | 9730 |
| Ti                           | 0.01  | 0.82             | 0.01  | 3.51           | 9.20 | 0.26  | 2.23 | 7.15 | 3.68 | 2.58           | bdl  | 1.01 | 0.67 | 1.13  | 1.00 | bdl         | 3.56 |
| V                            | 0.003 | 0.40             | 0.15  | 5.71           | 30.7 | 1.50  | 18.6 | 24.8 | 29.5 | 60.6           | 31.1 | 54.6 | 54.1 | 72.75 | 98.0 | 198         | 49.7 |
| Non-essential and toxic      |       |                  |       |                |      |       |      |      |      |                |      |      |      |       |      |             |      |
| Al*                          | 0.002 | 4.22             | 0.002 | 6.89           | 13.4 | 2.10  | 5.21 | 16.0 | 10.5 | 0.59           | 0.83 | 0.04 | 0.66 | 4.38  | 0.81 | 1.35        | 0.18 |
| As                           | 0.005 | bdl              | 0.13  | 0.88           | 1.02 | bdl   | 0.03 | 3.98 | 1.64 | 19.2           | 7.74 | 18.1 | 5.32 | 15.2  | 62.5 | 0.84        | 0.38 |
| Be                           | 0.006 | 0.12             | bdl   | 0.36           | 0.15 | bdl   | 0.36 | bdl  | 0.11 | 0.34           | 0.16 | 0.25 | 0.57 | 0.20  | 0.32 | 0.19        | 0.26 |
| Bi                           | 0.002 | 0.10             | bdl   | bdl            | bdl  | bdl   | bdl  | bdl  | bdl  | bdl            | bdl  | bdl  | bdl  | 0.01  | bdl  | bdl         | bdl  |
| Cd                           | 0.002 | 0.07             | 0.01  | 0.08           | 1.77 | 0.49  | 2.67 | 0.10 | 0.16 | 0.05           | 0.02 | 9.83 | 0.53 | 0.19  | 0.06 | 3.78        | 4.14 |
| Cr                           | 0.08  | 0.84             | 0.19  | 1.53           | 2.39 | 3.05  | 15.2 | 4.55 | 2.91 | 0.79           | 0.86 | 0.21 | 1.81 | 2.19  | 0.79 | 32.8        | 642  |
| Pb                           | 0.002 | 4.63             | 0.31  | 3.84           | 0.12 | 1.67  | 2.40 | 4.79 | 3.44 | 3.31           | 0.20 | 73.8 | 1.75 | 0.06  | 0.13 | 2.89        | 5.36 |
| Sb                           | 0.004 | 0.06             | 0.06  | 0.08           | 0.93 | bdl   | bdl  | 0.22 | 0.99 | 0.29           | 0.54 | 1.94 | 0.73 | 0.78  | 0.66 | 0.17        | bdl  |
| Sn                           | 0.008 | 2.52             | 0.21  | 0.86           | 1.11 | 0.30  | 0.26 | 1.38 | 1.39 | 1.64           | bdl  | 2.69 | 0.65 | 0.89  | 0.85 | 1.06        | 2.95 |
| Tl                           | 0.002 | bdl              | bdl   | bdl            | bdl  | bdl   | bdl  | bdl  | bdl  | bdl            | bdl  | bdl  | bdl  | bdl   | bdl  | 2.85        | bdl  |
| U                            | 0.002 | 0.80             | 0.87  | 1.41           | 277  | 0.15  | 0.13 | 3.49 | 5.68 | 3.47           | 3.65 | 97.3 | 15.6 | 23.3  | 5.13 | 1.64        | 0.41 |

**Table S6.** Concentration of elements measured in negative control, selected weathered coal ash eluates from the Štrmac and Plaški locality and in unweathered fly and bottom ash samples (in  $\mu\text{g/L}$  or \* $\text{mg/L}$ ). Note: *LOD* = limit of detection; *bdl* = below the detection limit

**Table S7.** Relative Mass Leached (%) of elements calculated for selected weathered coal ash eluates from the Štrmac and Plaški locality and in unweathered fly and bottom ash samples. Note: *bdl* = below the detection limit; *n.m.* = not measured total concentrations.

|                                     | Štrmac samples |      |      |      |      |      | Plaški samples |      |      |      |      |      | Unweathered |      |
|-------------------------------------|----------------|------|------|------|------|------|----------------|------|------|------|------|------|-------------|------|
|                                     | LŠ1            | LŠ7  | LŠ8  | LŠ11 | LŠ5  | LŠ4  | LP8            | LP9  | LP3  | LP10 | LP1  | LP5  | FA          | BA   |
| <b>Essential nutrients</b>          |                |      |      |      |      |      |                |      |      |      |      |      |             |      |
| Ca                                  | 0.41           | 4.39 | 1.85 | 4.55 | 0.10 | 0.20 | 0.40           | 0.46 | 3.04 | 0.31 | 0.26 | 0.22 | n.m.        | n.m. |
| Cu                                  | 0.14           | bdl  | 0.07 | 0.33 | 0.14 | 0.11 | 0.01           | 0.01 | 0.02 | 0.09 | 0.04 | 0.03 | 0.02        | 0.13 |
| Fe                                  | 0.01           | 0.01 | 0.02 | 0.01 | 0.02 | 0.01 | 0.01           | 0.01 | 0.01 | 0.01 | 0.01 | 0.01 | 0.01        | 0.01 |
| K                                   | 0.33           | 1.60 | 13.5 | 4.18 | 0.97 | 27.4 | 0.20           | 0.12 | 2.49 | 1.68 | 0.59 | 0.83 | n.m.        | n.m. |
| Mg                                  | 0.33           | 0.40 | 0.01 | 0.01 | 0.25 | 0.26 | 0.09           | 0.14 | 5.57 | 0.57 | 0.17 | 0.08 | n.m.        | n.m. |
| Mn                                  | 0.01           | 0.07 | 0.04 | 0.03 | 0.08 | 0.01 | 0.01           | 0.01 | 0.02 | 0.01 | 0.01 | bdl  | 0.01        | 0.04 |
| Mo                                  | 5.51           | 1.99 | 1.40 | 6.36 | 0.28 | 0.60 | 0.27           | 0.26 | 22.5 | 2.52 | 0.69 | 0.28 | 7.90        | 16.1 |
| Ni                                  | 0.42           | 0.14 | 0.47 | 0.39 | 0.69 | 2.75 | 0.02           | 0.01 | 0.03 | 0.04 | 0.04 | 0.03 | 0.19        | 0.38 |
| Zn                                  | 0.37           | 0.03 | 0.34 | 11.5 | 0.17 | 0.05 | 0.45           | 0.01 | 0.16 | 0.27 | 0.31 | 0.17 | 0.17        | 8.87 |
| <b>Non-essential and beneficial</b> |                |      |      |      |      |      |                |      |      |      |      |      |             |      |
| Ba                                  | 0.07           | 0.17 | 0.54 | 1.43 | 0.23 | 0.18 | 0.01           | 0.01 | 0.05 | 0.03 | 0.02 | 0.01 | 1.70        | 3.51 |
| Co                                  | 0.01           | 0.01 | 0.02 | 0.02 | 0.02 | 0.01 | 0.01           | 0.01 | 0.05 | 0.01 | 0.01 | 0.01 | bdl         | 0.07 |
| Cs                                  | 0.01           | 0.01 | 0.50 | 2.08 | bdl  | 0.59 | 0.04           | 0.01 | 0.20 | 0.15 | 0.05 | 0.05 | n.m.        | n.m. |
| Li                                  | bdl            | 0.33 | 0.15 | 0.81 | bdl  | bdl  | 0.07           | 0.10 | 2.25 | 1.16 | 0.27 | 0.09 | 7.03        | 7.24 |
| Na                                  | 0.54           | 2.46 | 0.50 | 4.30 | 5.07 | 0.72 | 0.60           | 0.02 | 20.5 | 0.62 | 1.37 | 0.13 | n.m.        | n.m. |
| Rb                                  | 0.01           | 0.28 | 0.43 | 3.76 | 0.18 | 0.44 | 0.12           | 0.04 | 0.83 | 0.61 | 0.21 | 0.15 | 0.42        | 0.16 |
| Se                                  | 0.55           | 0.65 | 0.01 | 0.54 | 0.09 | 0.92 | 0.34           | bdl  | 5.37 | 0.23 | 0.70 | 3.91 | 6.42        | 15.2 |
| Sr                                  | 0.59           | 4.55 | 1.83 | 8.57 | 0.16 | 0.36 | 0.27           | 0.21 | 2.02 | 0.46 | 0.20 | 0.14 | 9.45        | 10.3 |
| Ti                                  | 0.01           | 0.01 | 0.01 | 0.01 | 0.01 | 0.01 | 0.01           | 0.01 | 0.01 | 0.01 | 0.01 | 0.01 | bdl         | 0.01 |
| V                                   | 0.04           | 0.05 | 0.01 | 0.07 | 0.29 | 0.28 | 0.24           | 0.14 | 0.21 | 0.25 | 0.24 | 0.35 | 0.27        | 0.10 |
| <b>Non-essential and toxic</b>      |                |      |      |      |      |      |                |      |      |      |      |      |             |      |
| Al                                  | 0.13           | 0.35 | 0.10 | 0.21 | 1.15 | 0.51 | 0.01           | 0.01 | 0.01 | 0.01 | 0.07 | 0.01 | 0.10        | 0.02 |
| As                                  | 0.12           | 0.01 | bdl  | 0.01 | 0.22 | 0.19 | 0.22           | 0.21 | 0.17 | 0.24 | 0.23 | 1.52 | 0.04        | 0.05 |
| Be                                  | 0.21           | 0.03 | bdl  | 0.21 | bdl  | 0.12 | 0.17           | 0.07 | 0.14 | 0.35 | 0.12 | 0.16 | 0.19        | 0.50 |
| Bi                                  | bdl            | bdl  | bdl  | bdl  | bdl  | bdl  | bdl            | bdl  | bdl  | bdl  | 0.07 | bdl  | 0.01        | bdl  |
| Cd                                  | 0.36           | 0.22 | bdl  | 8.95 | 0.10 | 0.14 | 0.09           | 0.06 | 21.6 | 2.71 | 0.44 | 0.15 | 3.39        | 24.0 |
| Cr                                  | 0.01           | 0.02 | 0.03 | 0.12 | 0.10 | 0.04 | 0.01           | 0.02 | 0.01 | 0.01 | 0.01 | 0.01 | 0.20        | 5.00 |
| Pb                                  | 0.13           | 0.01 | 0.33 | 0.38 | 0.33 | 0.02 | 0.19           | 0.01 | 5.08 | 0.35 | 0.01 | 0.01 | 0.17        | 2.59 |
| Sb                                  | 0.09           | 0.05 | bdl  | bdl  | 0.16 | 0.45 | 0.12           | 0.26 | 0.94 | 0.62 | 0.41 | 0.33 | 0.07        | bdl  |
| Sn                                  | 0.22           | 0.13 | 0.19 | 0.17 | 0.66 | 0.09 | 0.54           | bdl  | 0.85 | 0.28 | 0.52 | 0.44 | 0.53        | 2.75 |
| Tl                                  | bdl            | 0.01 | bdl  | bdl  | bdl  | bdl  | bdl            | bdl  | bdl  | bdl  | bdl  | bdl  | 1.63        | bdl  |
| U                                   | 0.36           | 2.58 | 0.01 | 0.01 | 0.24 | 0.60 | 0.12           | 0.21 | 1.51 | 0.51 | 0.44 | 0.14 | 0.01        | 0.01 |

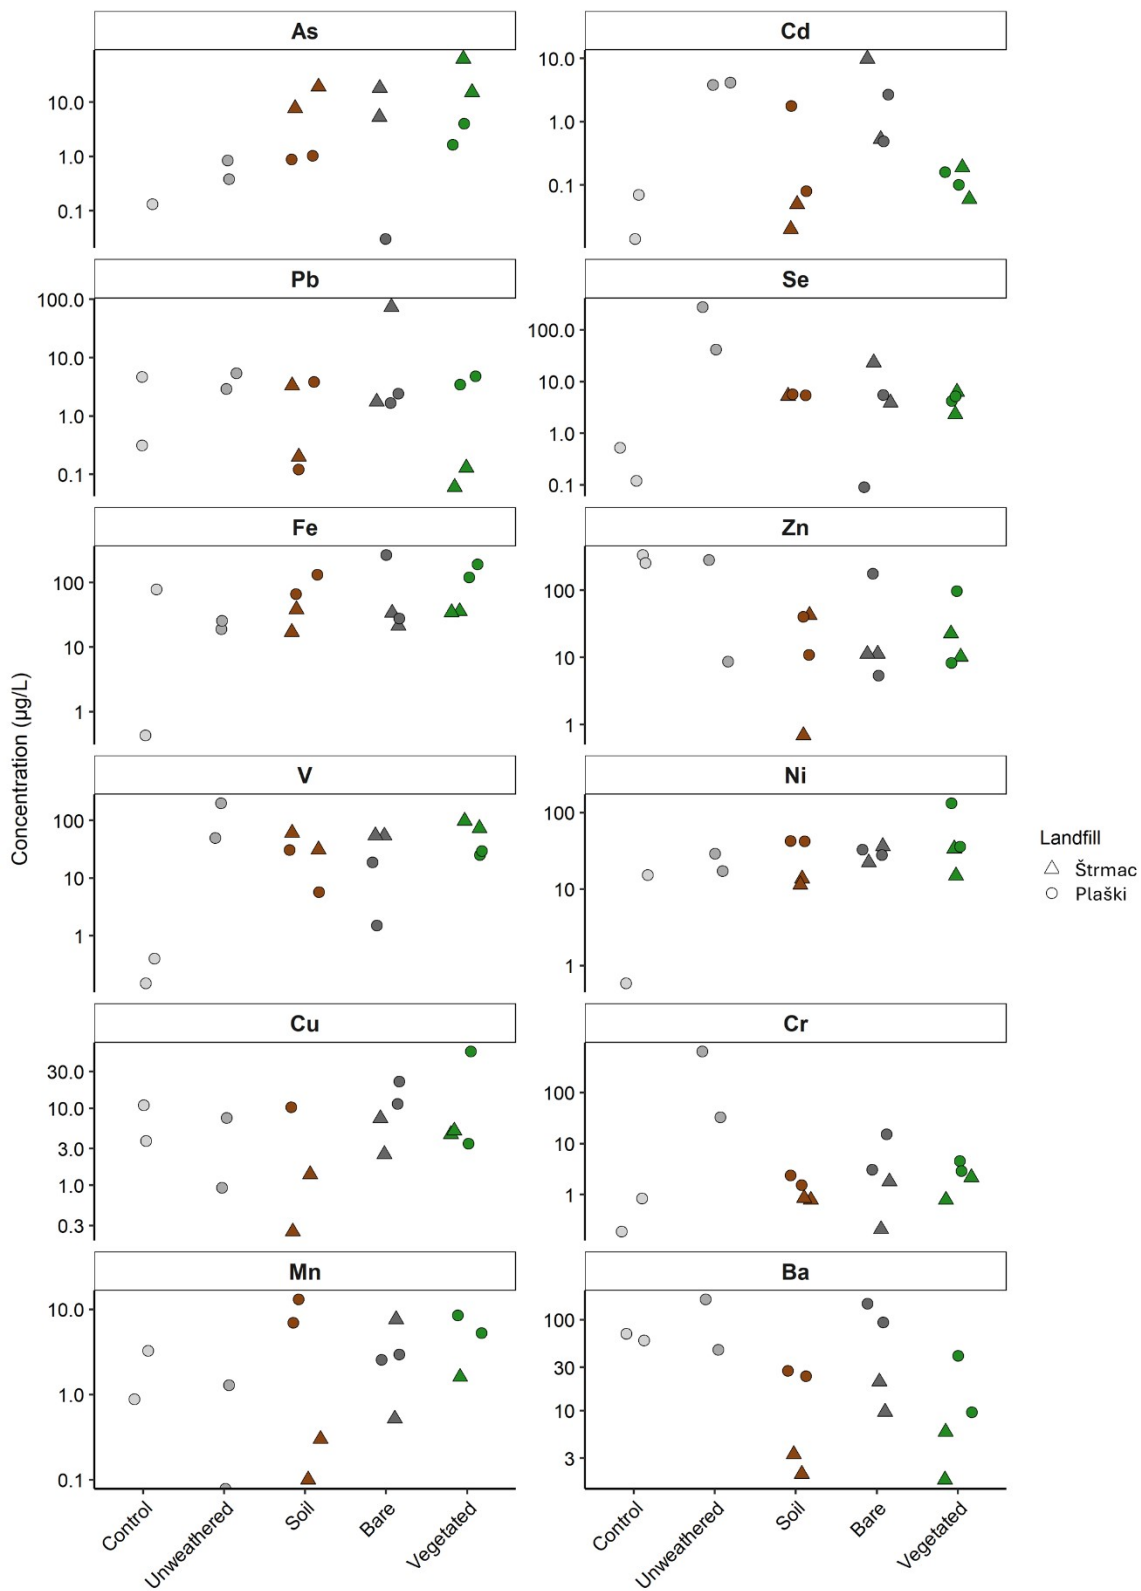

**Figure S1.** Concentration (log-scale) of selected elements in control, unweathered, soil, bare, and vegetated samples. Concentrations of all measured elements are in Supplementary material (Tab. S2 and 3).

**Table S8.** One-way ANOVA results for seed germination (SG), mitotic index (MI), and chromosomal aberrations (CA) in samples from the Štrmac and Plaški landfills. Degrees of freedom (df), F values, and p values are shown. Tukey's HSD test was applied when ANOVA indicated significant differences ( $p < 0.05$ ).

| Endpoint | Site   | Phase    | Treatments included                               | df_between | df_within | F    | p-value |
|----------|--------|----------|---------------------------------------------------|------------|-----------|------|---------|
| SG       | Štrmac | Exposure | Cneg, LŠ1, LŠ4, LŠ5, LŠ7, LŠ8, LŠ11               | 6          | 21        | 6.38 | 0.001   |
|          | Plaški | Exposure | Cneg, LP1, LP3, LP5, LP8, LP9, LP10               | 6          | 21        | 17.4 | <0.001  |
| MI       | Štrmac | Exposure | Cneg, LŠ1, LŠ7, LŠ5, LŠ4, LŠ8, LŠ11, FA, BA, Cpos | 9          | 40        | 8.42 | <0.001  |
|          | Plaški | Exposure | Cneg, LP8, LP9, LP5, LP1, LP3, LP10, Cpos         | 7          | 32        | 10.8 | <0.001  |
|          | Štrmac | Recovery | Same as exposure (Štrmac)                         | 9          | 40        | 1.60 | 0.147   |
|          | Plaški | Recovery | Same as exposure (Plaški)                         | 7          | 32        | 1.69 | 0.147   |
| CA       | Štrmac | Exposure | Cneg, LŠ1, LŠ7, LŠ5, LŠ4, LŠ8, LŠ11, FA, BA, Cpos | 9          | 40        | 6.74 | <0.001  |
|          | Plaški | Exposure | Cneg, LP8, LP9, LP5, LP1, LP3, LP10, Cpos         | 7          | 32        | 4.41 | 0.002   |
|          | Štrmac | Recovery | Same as exposure (Štrmac)                         | 9          | 40        | 3.01 | 0.008   |
|          | Plaški | Recovery | Same as exposure (Plaški)                         | 7          | 32        | 1.27 | 0.299   |

**Table S9.** Percentage of observed disturbed phases and most common disturbances in Štrmac samples

|                    | Total cells | Dividing cells | P   | M  | A  | T  | MI   | Std. Err. | No. of Aberr. | CA   | Std. Err. | Micronucl. | Polycentric phase | Lagging/Vagrant | Ana bridge | Spindle disturbance | Not centred phase | Stickiness | Doubled phase | Ring/rope Chrom. |
|--------------------|-------------|----------------|-----|----|----|----|------|-----------|---------------|------|-----------|------------|-------------------|-----------------|------------|---------------------|-------------------|------------|---------------|------------------|
| Štrmac - Treatment |             |                |     |    |    |    |      |           |               |      |           |            |                   |                 |            |                     |                   |            |               |                  |
| <b>Cneg</b>        | 6817        | 407            | 235 | 75 | 34 | 63 | 6.03 | 0.57      | 3             | 0.73 | 0.48      |            | 1                 |                 | 1          |                     |                   |            |               | 1                |
| <b>LŠ1</b>         | 6204        | 280            | 136 | 62 | 36 | 46 | 4.53 | 0.51      | 2             | 0.78 | 0.48      |            |                   | 1               |            |                     | 1                 |            |               |                  |
| <b>LŠ7</b>         | 5651        | 148            | 67  | 40 | 22 | 19 | 2.67 | 0.19      | 36            | 24.2 | 2.27      |            | 1                 | 10              | 2          | 12                  | 1                 | 6          |               | 4                |
| <b>LŠ8</b>         | 5136        | 168            | 92  | 37 | 21 | 18 | 3.15 | 0.87      | 11            | 4.32 | 2.82      |            |                   | 3               | 2          | 1                   | 1                 | 2          |               | 2                |
| <b>LŠ11</b>        | 7063        | 208            | 103 | 50 | 32 | 23 | 3.06 | 0.55      | 30            | 14.6 | 4.47      | 1          | 2                 | 8               | 2          | 9                   | 2                 | 5          |               | 1                |
| <b>LŠ5</b>         | 5291        | 136            | 60  | 33 | 26 | 17 | 2.58 | 0.53      | 27            | 19.6 | 2.95      | 3          | 3                 | 3               |            | 6                   |                   | 9          |               | 3                |
| <b>LŠ4</b>         | 6403        | 224            | 131 | 55 | 18 | 20 | 3.65 | 0.53      | 26            | 11.6 | 1.37      |            | 2                 | 5               |            | 10                  | 1                 | 5          |               | 3                |
| <b>Cpos</b>        | 5527        | 20             | 10  | 8  | 0  | 2  | 0.35 | 0.16      | 1             | 5.56 | 5.56      |            |                   |                 |            | 1                   |                   |            |               |                  |
| Štrmac – Recovery  |             |                |     |    |    |    |      |           |               |      |           |            |                   |                 |            |                     |                   |            |               |                  |
| <b>Cneg</b>        | 6707        | 359            | 215 | 78 | 40 | 26 | 5.36 | 0.17      | 10            | 3.10 | 0.44      | 1          | 3                 | 4               | 1          | 1                   |                   |            |               |                  |
| <b>LŠ1</b>         | 7894        | 265            | 158 | 50 | 27 | 30 | 3.71 | 0.85      | 14            | 3.59 | 3.05      |            |                   | 4               |            | 4                   | 1                 | 2          | 1             | 2                |
| <b>LŠ7</b>         | 6852        | 222            | 142 | 45 | 17 | 18 | 3.27 | 0.75      | 21            | 8.66 | 3.27      |            | 1                 | 3               | 1          | 9                   | 3                 |            | 2             | 2                |
| <b>LŠ8</b>         | 6977        | 348            | 179 | 86 | 36 | 47 | 5.10 | 0.35      | 26            | 7.82 | 2.62      |            | 3                 | 7               | 5          | 6                   | 3                 |            | 1             | 1                |
| <b>LŠ11</b>        | 6187        | 242            | 135 | 55 | 24 | 28 | 3.52 | 0.89      | 9             | 2.90 | 1.13      |            | 1                 | 1               |            |                     |                   | 5          |               | 2                |
| <b>LŠ5</b>         | 5971        | 221            | 121 | 52 | 25 | 23 | 3.73 | 1.00      | 15            | 4.58 | 2.13      |            | 1                 | 4               | 1          | 5                   | 1                 |            | 1             | 2                |
| <b>LŠ4</b>         | 8807        | 289            | 179 | 51 | 29 | 30 | 3.31 | 0.66      | 28            | 9.12 | 1.25      | 3          | 1                 | 7               | 3          | 7                   | 2                 | 3          | 1             | 1                |
| <b>Cpos</b>        | 6101        | 185            | 95  | 42 | 31 | 17 | 2.97 | 0.86      | 23            | 12.0 | 3.13      |            | 3                 | 5               | 4          | 4                   | 3                 | 3          | 1             |                  |

**Table S10.** Percentage of observed disturbed phases and most common disturbances in Plaški samples

|                    | Total cells | Dividing cells | P   | M  | A  | T  | MI   | Std. Err. | No. of Aberr. | CA   | Std. Err. | Micronuclei | Polycentric phase | Lagging/Vagrant | Ana bridge | Spindle disturbance | Not centred phase | Stickiness | Doubled phase | Ring/rope Chrom. |
|--------------------|-------------|----------------|-----|----|----|----|------|-----------|---------------|------|-----------|-------------|-------------------|-----------------|------------|---------------------|-------------------|------------|---------------|------------------|
| Plaški - Treatment |             |                |     |    |    |    |      |           |               |      |           |             |                   |                 |            |                     |                   |            |               |                  |
| <b>Cneg</b>        | 5642        | 186            | 75  | 62 | 24 | 25 | 3.29 | 0.21      | 5             | 2.97 | 1.22      | 0           | 0                 | 2               | 0          | 0                   | 0                 | 1          | 0             | 2                |
| <b>LP8</b>         | 6279        | 225            | 106 | 59 | 36 | 24 | 3.59 | 0.21      | 55            | 24.7 | 4.37      | 0           | 3                 | 19              | 2          | 14                  | 1                 | 7          | 0             | 7                |
| <b>LP9</b>         | 6566        | 201            | 109 | 54 | 24 | 14 | 3.64 | 0.79      | 46            | 18.1 | 5.05      | 0           | 1                 | 11              | 0          | 19                  | 0                 | 10         | 0             | 7                |
| <b>LP1</b>         | 6003        | 111            | 42  | 37 | 14 | 18 | 1.94 | 0.66      | 14            | 13.2 | 4.07      | 0           | 0                 | 2               | 0          | 8                   | 0                 | 4          | 0             | 0                |
| <b>LP5</b>         | 6265        | 216            | 107 | 45 | 43 | 21 | 3.39 | 0.39      | 48            | 22.9 | 1.87      | 0           | 4                 | 22              | 4          | 13                  | 3                 | 2          | 1             | 0                |
| <b>LP10</b>        | 5678        | 214            | 108 | 50 | 32 | 24 | 3.93 | 0.48      | 30            | 14.4 | 2.08      | 0           | 1                 | 10              | 1          | 10                  | 0                 | 1          | 0             | 7                |
| <b>LP3</b>         | 5942        | 214            | 121 | 52 | 25 | 16 | 3.66 | 0.44      | 26            | 14.5 | 7.11      | 0           | 2                 | 8               | 1          | 10                  | 0                 | 4          | 0             | 0                |
| <b>FA</b>          | 4521        | 107            | 51  | 23 | 26 | 7  | 2.37 | 0.32      | 35            | 32.6 | 5.47      | 0           | 4                 | 11              | 5          | 10                  | 0                 | 3          | 0             | 2                |
| <b>BA</b>          | 5665        | 156            | 61  | 36 | 31 | 28 | 2.56 | 0.50      | 39            | 20.6 | 5.26      | 0           | 7                 | 18              | 2          | 9                   | 1                 | 2          | 0             | 0                |
| <b>Cpos</b>        | 5958        | 41             | 19  | 13 | 2  | 7  | 0.69 | 0.35      | 3             | 6.00 | 4.76      | 0           | 0                 | 2               | 0          | 1                   | 0                 | 0          | 0             | 0                |
| Plaški – Recovery  |             |                |     |    |    |    |      |           |               |      |           |             |                   |                 |            |                     |                   |            |               |                  |
| <b>Cneg</b>        | 6256        | 288            | 112 | 92 | 38 | 36 | 4.51 | 0.08      | 11            | 6.17 | 1.94      | 0           | 0                 | 5               | 2          | 0                   | 3                 | 1          | 0             | 0                |
| <b>LP8</b>         | 6382        | 160            | 90  | 36 | 20 | 14 | 2.47 | 0.77      | 14            | 8.19 | 6.96      | 0           | 2                 | 3               | 2          | 3                   | 0                 | 1          | 1             | 2                |
| <b>LP9</b>         | 5279        | 221            | 104 | 55 | 25 | 37 | 4.16 | 1.02      | 40            | 13.9 | 3.38      | 0           | 3                 | 9               | 3          | 15                  | 0                 | 4          | 1             | 5                |
| <b>LP1</b>         | 6282        | 222            | 105 | 61 | 23 | 33 | 3.63 | 0.87      | 19            | 14.3 | 3.28      | 0           | 4                 | 6               | 2          | 4                   | 0                 | 0          | 1             | 0                |
| <b>LP5</b>         | 5367        | 228            | 113 | 52 | 31 | 32 | 4.24 | 1.38      | 47            | 15.5 | 6.43      | 0           | 7                 | 12              | 3          | 18                  | 2                 | 2          | 2             | 1                |
| <b>LP10</b>        | 5797        | 247            | 141 | 45 | 24 | 37 | 4.20 | 0.39      | 29            | 11.3 | 3.20      | 0           | 0                 | 10              | 1          | 13                  | 0                 | 2          | 2             | 1                |
| <b>LP3</b>         | 5884        | 316            | 170 | 67 | 39 | 40 | 5.44 | 0.38      | 58            | 13.5 | 4.15      | 0           | 6                 | 18              | 2          | 23                  | 0                 | 0          | 0             | 9                |
| <b>FA</b>          | 6781        | 287            | 127 | 86 | 41 | 33 | 4.24 | 0.49      | 57            | 20.9 | 4.99      | 0           | 5                 | 18              | 0          | 27                  | 0                 | 1          | 2             | 3                |
| <b>BA</b>          | 5328        | 272            | 120 | 75 | 34 | 43 | 5.14 | 0.32      | 40            | 14.5 | 3.61      | 0           | 0                 | 3               | 6          | 6                   | 0                 | 1          | 0             | 2                |
| <b>Cpos</b>        | 5286        | 159            | 81  | 46 | 17 | 15 | 2.98 | 0.83      | 11            | 4.01 | 2.43      | 0           | 3                 | 3               | 0          | 4                   | 0                 | 1          | 0             | 0                |
